# Supplementary material for: Exceptional modulation of upconversion and downconversion near-infrared luminescence in Tm/Yb-codoped ferroelectric nanocomposite by nanoscale engineering
Source: Royal Society of Chemistry journal article supplement (doi:10.1039/c9nr02532d), 2019-01-01
Supplement: c9nr02532d1.pdf [file c9nr02532d1.pdf]

## Supporting Information

Manuscript ID: NR-ART-03-2019-002532

**TITLE:** Exceptional Modulation of Upconversion and Downconversion Near-infrared Luminescence in Tm/Yb Codoped Ferroelectric Nanocomposite by Nanoscale Engineering

Er Pan, Gongxun Bai\*, Jun Zhou, Lei Lei, Shiqing Xu\*

College of Materials Science and Engineering, China Jiliang University, Hangzhou 310018, People's Republic of China

\*Address correspondence to baigongxun@126.com; shiqingxu75@163.com

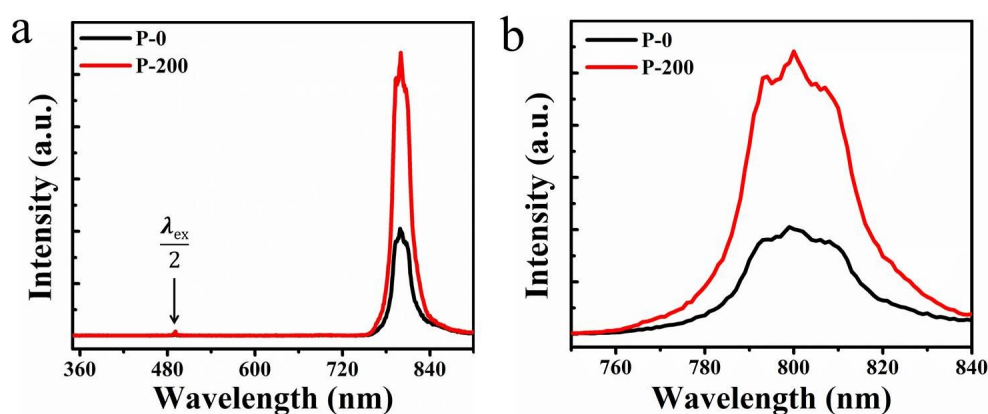

**Fig. S1.** (a) The whole upconversion spectra of the P-0 and P-200 samples. (b) The upconversion spectra from 750 to 840 nm of the P-0 and P-200 samples.

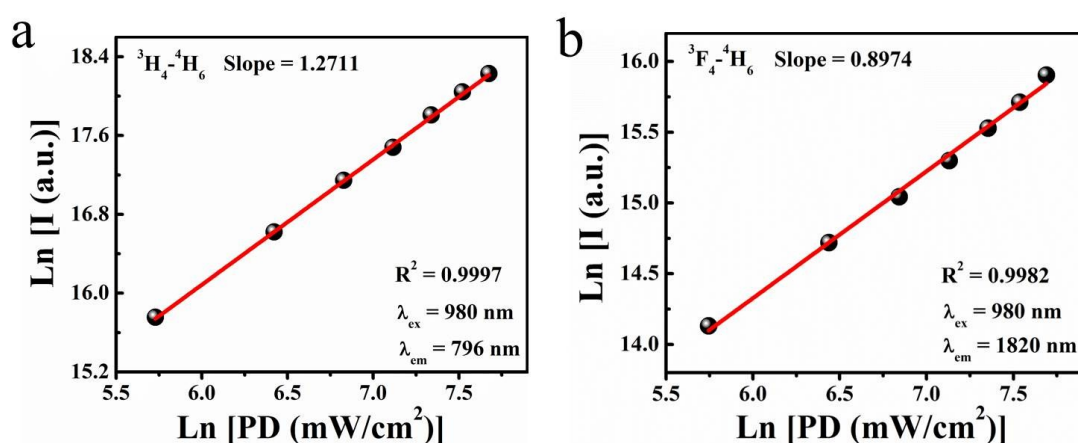

**Fig. S2.** (a) Double logarithmic plot of upconversion intensity of Yb<sup>3+</sup>/Tm<sup>3+</sup> codoped sample dependent on the excitation power density after loading an electric field of 200 kV/cm. (b) Double logarithmic plot of downconversion intensity of Yb<sup>3+</sup>/Tm<sup>3+</sup> codoped sample dependent on the excitation power density after loading an electric field of 200 kV/cm.

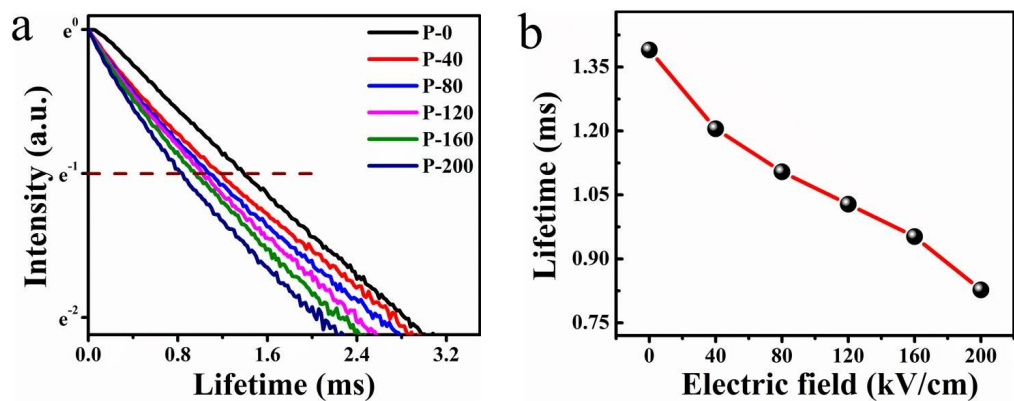

**Fig. S3.** (a) The measured downconversion infrared decay curves of Tm<sup>3+</sup>:<sup>3</sup>F<sub>4</sub>-<sup>4</sup>H<sub>6</sub>. (b) The trend of P-j lifetime relative to the elevated electric field.

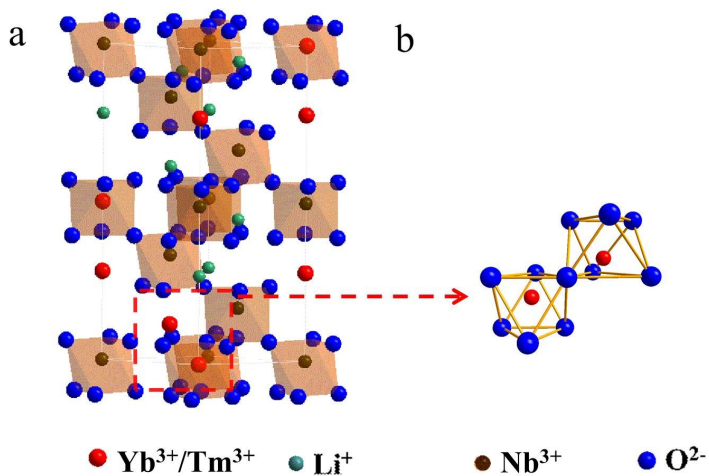

**Fig. S4.** (a) The schematic diagram of the lanthanide ions enters the LiNbO<sub>3</sub> crystal structure. (b) A partial enlargement shows the ligand field around Yb<sup>3+</sup>/Tm<sup>3+</sup>.
